# Supplementary material for: New Antifungal Compound: Impact of Cosolvency, Micellization and Complexation on Solubility and Permeability Processes
Source: MDPI journal article supplement (doi:10.3390/pharmaceutics13111865), 2021-11-04
Supplement: s1 [file s1]

Supplementary Material

# New Antifungal Compound: Impact of Cosolvency, Micellization and Complexation on Solubility and Permeability Processes

Tatyana V. Volkova, Olga R. Simonova and German L. Perlovich \*

Gennady Alekseevich Krestov Institute of Solution Chemistry of the Russian Academy of Sciences , 153045 Ivanovo, Russia; vtv@isc-ras.ru (T.V.V.); ors@isc-ras.ru (O.R.S.)

\* Correspondence: glp@isc-ras.ru

**Citation:** Volkova, T.V.; Simonova, O.R.; Perlovich, G.L. New Antifungal Compound: Impact of Cosolvency, Micellization and Complexation on Solubility and Permeability Processes. *Pharmaceutics* **2021**, *13*, 1865. <https://doi.org/10.3390/pharmaceutics13111865>

Academic Editors: Anton V. Syroeshkin and Elena V. Uspenskaya

Received: 29 September 2021

Accepted: 1 November 2021

Published: 4 November 2021

**Publisher's Note:** MDPI stays neutral with regard to jurisdictional claims in published maps and institutional affiliations.

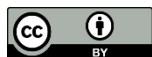

**Copyright:** © 2021 by the authors. Licensee MDPI, Basel, Switzerland. This article is an open access article distributed under the terms and conditions of the Creative Commons Attribution (CC BY) license (<http://creativecommons.org/licenses/by/4.0/>).

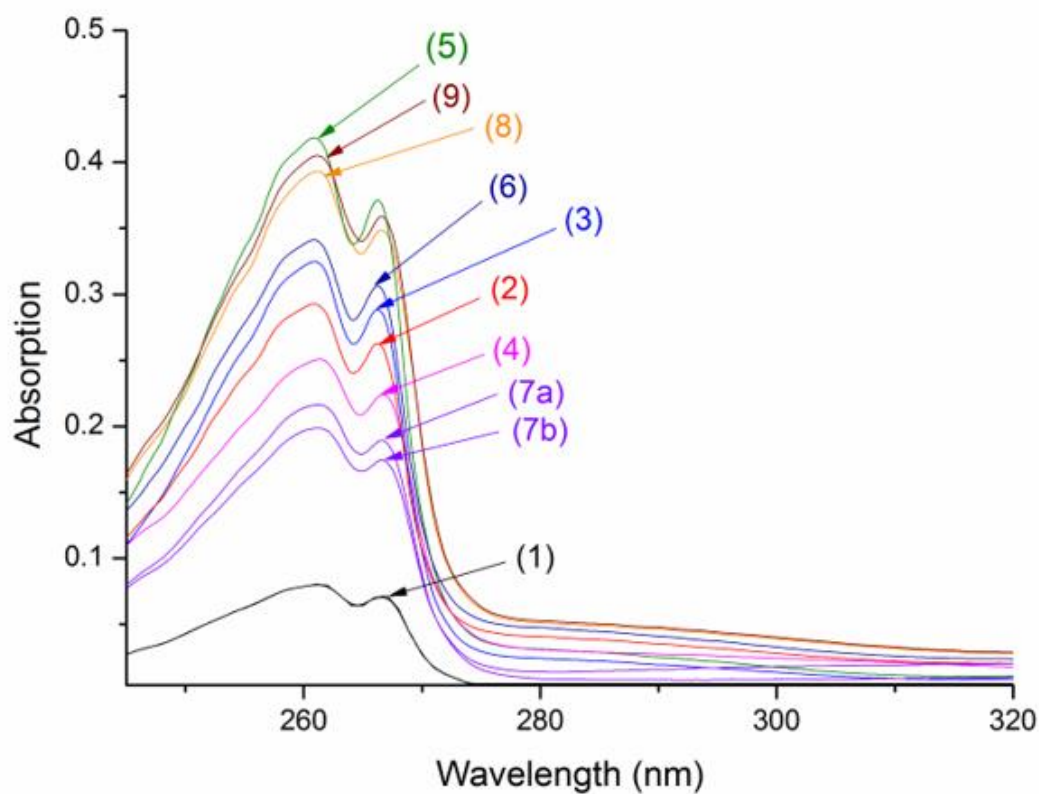

**Figure S1.** Absorption spectra of S-119 in buffer solution (pH 7.4) and in the presence of different excipients: (1) - pure buffer; (2) - PEG; (3) - PVP; (4) - Brij S20; (5) - F-127; (6) -  $\alpha$ -CD; (7a) -  $\beta$ -CD 0.001M; (7b) -  $\beta$ -CD 0.004 M; (8) - HP- $\beta$ -CD; (9) O-M- $\beta$ -CD.

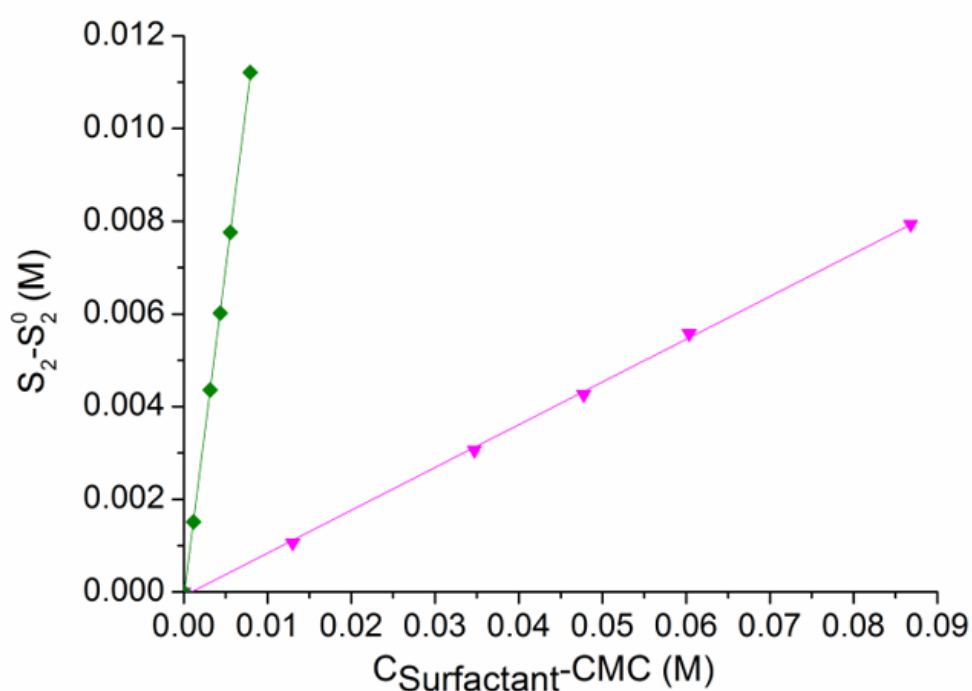

**Figure S2.** Plots correlating the S-119 solubility ( $S-S^0$ ) in Brij S20 (▼) and F127 (◆) solutions at pH 7.4 on surfactant concentration ( $C_{\text{surfactant}}-CMC$ ) at 25 °C.

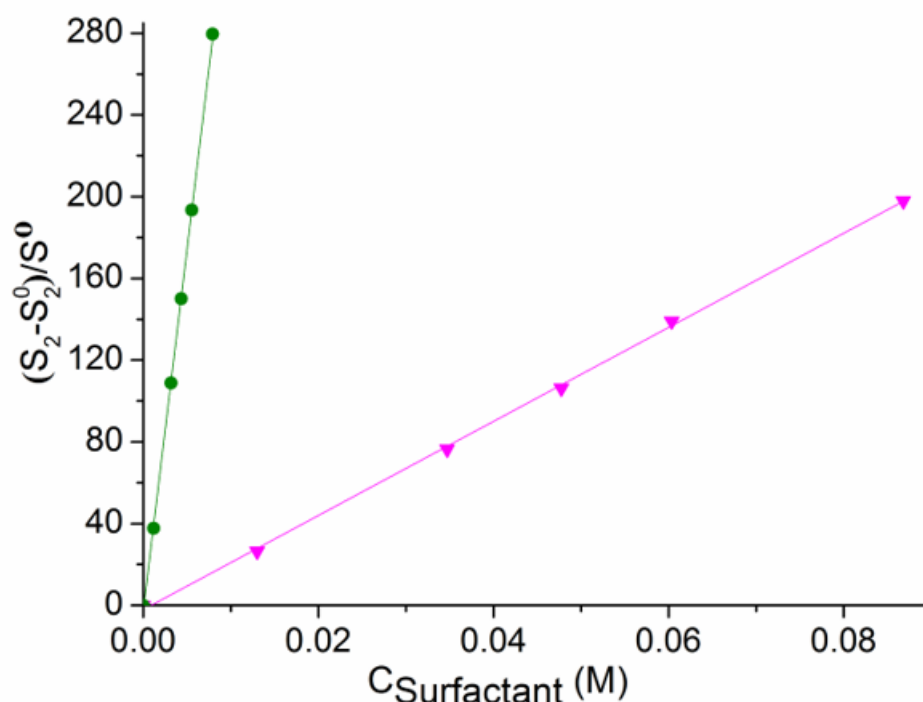

**Figure S3.** Plots correlating the solubility in Brij S20 (▼) and F127 (◆) at pH 7.4 normalized by the aqueous solubility ( $S_2 / S_2^0$ ) at pH 7.4 on surfactant concentration ( $C_{\text{Surfactant}}$ ) at 25 °C.

**Table S1.** Solubility of S-119 in different media at 25.0±0.1°C.

| Medium                    | Solubility, M                   |                                 |
|---------------------------|---------------------------------|---------------------------------|
|                           | Buffer pH 2.0                   | Buffer pH 7.4                   |
| Pure buffer               | $(4.45 \pm 0.14) \cdot 10^{-3}$ | $(4.01 \pm 0.11) \cdot 10^{-5}$ |
| PEG 6000 (1.5 w/v%)       | $(4.74 \pm 0.11) \cdot 10^{-3}$ | $(7.82 \pm 0.15) \cdot 10^{-5}$ |
| PEG 6000 (4 w/v%)         | $(5.24 \pm 0.15) \cdot 10^{-3}$ | $(8.41 \pm 0.16) \cdot 10^{-4}$ |
| PEG 6000 (5.5 w/v%)       | $(5.57 \pm 0.09) \cdot 10^{-3}$ | $(4.14 \pm 0.07) \cdot 10^{-3}$ |
| PEG 6000 (7 w/v%)         | $(5.86 \pm 0.11) \cdot 10^{-3}$ | $(6.80 \pm 0.08) \cdot 10^{-3}$ |
| PEG 6000 (10 w/v%)        | $(6.47 \pm 0.17) \cdot 10^{-3}$ | $(7.73 \pm 0.21) \cdot 10^{-3}$ |
| PEG 35000 (1.5 w/v%)      | $(4.59 \pm 0.14) \cdot 10^{-3}$ | $(9.01 \pm 0.26) \cdot 10^{-5}$ |
| PEG 35000 (4 w/v%)        | $(4.80 \pm 0.08) \cdot 10^{-3}$ | $(4.28 \pm 0.14) \cdot 10^{-4}$ |
| PEG 35000 (5.5 w/v%)      | $(4.94 \pm 0.13) \cdot 10^{-3}$ | $(1.53 \pm 0.03) \cdot 10^{-3}$ |
| PEG 35000 (7 w/v%)        | $(5.05 \pm 0.09) \cdot 10^{-3}$ | $(5.59 \pm 0.14) \cdot 10^{-3}$ |
| PEG 35000 (10 w/v%)       | $(5.32 \pm 0.14) \cdot 10^{-3}$ | $(7.16 \pm 0.16) \cdot 10^{-3}$ |
| PVP (1.5 w/v%)            | $(4.60 \pm 0.05) \cdot 10^{-3}$ | $(2.81 \pm 0.04) \cdot 10^{-4}$ |
| PVP (4 w/v%)              | $(5.03 \pm 0.08) \cdot 10^{-3}$ | $(2.93 \pm 0.04) \cdot 10^{-4}$ |
| PVP (5.5 w/v%)            | $(5.16 \pm 0.14) \cdot 10^{-3}$ | $(1.25 \pm 0.03) \cdot 10^{-3}$ |
| PVP (7 w/v%)              | $(5.45 \pm 0.14) \cdot 10^{-3}$ | $(7.56 \pm 0.24) \cdot 10^{-3}$ |
| PVP (10 w/v%)             | $(5.86 \pm 0.14) \cdot 10^{-3}$ | $(9.29 \pm 0.22) \cdot 10^{-3}$ |
| Brij S20 (1.5 w/v%)       | $(3.89 \pm 0.03) \cdot 10^{-3}$ | $(1.10 \pm 0.04) \cdot 10^{-3}$ |
| Brij S20 (4 w/v%)         | $(3.48 \pm 0.14) \cdot 10^{-3}$ | $(3.10 \pm 0.04) \cdot 10^{-3}$ |
| Brij S20 (5.5 w/v%)       | $(3.45 \pm 0.05) \cdot 10^{-3}$ | $(4.30 \pm 0.08) \cdot 10^{-3}$ |
| Brij S20 (7 w/v%)         | $(3.45 \pm 0.07) \cdot 10^{-3}$ | $(5.62 \pm 0.08) \cdot 10^{-3}$ |
| Brij S20 (10 w/v%)        | $(3.45 \pm 0.07) \cdot 10^{-3}$ | $(7.98 \pm 0.14) \cdot 10^{-3}$ |
| Pluronic F-127 (1.5 w/v%) | $(4.45 \pm 0.11) \cdot 10^{-3}$ | $(1.55 \pm 0.03) \cdot 10^{-3}$ |
| Pluronic F-127 (4 w/v%)   | $(4.43 \pm 0.13) \cdot 10^{-3}$ | $(4.40 \pm 0.06) \cdot 10^{-3}$ |
| Pluronic F-127 (5.5 w/v%) | $(4.14 \pm 0.07) \cdot 10^{-3}$ | $(6.06 \pm 0.16) \cdot 10^{-3}$ |
| Pluronic F-127 (7 w/v%)   | $(3.99 \pm 0.04) \cdot 10^{-3}$ | $(7.80 \pm 0.15) \cdot 10^{-3}$ |
| Pluronic F-127 (10 w/v%)  | -                               | $(1.13 \pm 0.11) \cdot 10^{-2}$ |

|                             |                                 |                                 |
|-----------------------------|---------------------------------|---------------------------------|
| $\alpha$ -CD (1.5 w/v%)     | $(4.80 \pm 0.14) \cdot 10^{-3}$ | $(2.15 \pm 0.06) \cdot 10^{-4}$ |
| $\alpha$ -CD (4 w/v%)       | $(5.33 \pm 0.18) \cdot 10^{-3}$ | $(5.40 \pm 0.07) \cdot 10^{-4}$ |
| $\alpha$ -CD (5.5 w/v%)     | $(5.69 \pm 0.08) \cdot 10^{-3}$ | $(7.12 \pm 0.10) \cdot 10^{-4}$ |
| $\alpha$ -CD (7 w/v%)       | $(6.03 \pm 0.17) \cdot 10^{-3}$ | $(9.06 \pm 0.11) \cdot 10^{-4}$ |
| $\beta$ -CD (0.11 w/v%)     | $(4.56 \pm 0.04) \cdot 10^{-3}$ | $(1.97 \pm 0.02) \cdot 10^{-4}$ |
| $\beta$ -CD (0.17 w/v%)     | $(4.62 \pm 0.12) \cdot 10^{-3}$ | $(2.71 \pm 0.06) \cdot 10^{-4}$ |
| $\beta$ -CD (0.23 w/v%)     | $(4.67 \pm 0.11) \cdot 10^{-3}$ | $(3.50 \pm 0.05) \cdot 10^{-4}$ |
| $\beta$ -CD (0.34 w/v%)     | $(4.78 \pm 0.09) \cdot 10^{-3}$ | $(4.96 \pm 0.14) \cdot 10^{-4}$ |
| $\beta$ -CD (0.45 w/v%)     | $(4.58 \pm 0.04) \cdot 10^{-3}$ | $(2.04 \pm 0.10) \cdot 10^{-4}$ |
| HP- $\beta$ -CD (1.5 w/v%)  | $(5.09 \pm 0.16) \cdot 10^{-3}$ | $(9.66 \pm 0.24) \cdot 10^{-4}$ |
| HP- $\beta$ -CD (4 w/v%)    | $(6.11 \pm 0.17) \cdot 10^{-3}$ | $(2.41 \pm 0.05) \cdot 10^{-3}$ |
| HP- $\beta$ -CD (7 w/v%)    | $(7.42 \pm 0.10) \cdot 10^{-3}$ | $(4.26 \pm 0.14) \cdot 10^{-3}$ |
| HP- $\beta$ -CD (10 w/v%)   | $(8.71 \pm 0.10) \cdot 10^{-3}$ | $(6.07 \pm 0.12) \cdot 10^{-3}$ |
| O-M- $\beta$ -CD (1.5 w/v%) | $(5.21 \pm 0.11) \cdot 10^{-3}$ | $(1.38 \pm 0.02) \cdot 10^{-3}$ |
| O-M- $\beta$ -CD (4 w/v%)   | $(6.56 \pm 0.15) \cdot 10^{-3}$ | $(3.55 \pm 0.06) \cdot 10^{-3}$ |
| O-M- $\beta$ -CD (5.5 w/v%) | $(7.33 \pm 0.14) \cdot 10^{-3}$ | $(4.87 \pm 0.11) \cdot 10^{-3}$ |
| O-M- $\beta$ -CD (7 w/v%)   | $(8.13 \pm 0.19) \cdot 10^{-3}$ | $(6.26 \pm 0.15) \cdot 10^{-3}$ |

**Table S2.** Stability constants ( $K_s$ ) and complexation efficiency (CE) of S-119 complexes with cyclodextrins in buffer solutions at pH 2.0 and pH 7.4 at 25.0±0.1 °C.

|                        | $K_s^*, M^{-1}$ |                | CE** (%) |        | Molar Ratio*** (drug:CD) |        |
|------------------------|-----------------|----------------|----------|--------|--------------------------|--------|
|                        | pH 2.0          | pH 7.4         | pH 2.0   | pH 7.4 | pH 2.0                   | pH 7.4 |
| S-119/ $\alpha$ -CD    | 5.0 ± 0.2       | 304.4 ± 17     | 2.2      | 1.2    | 1:45                     | 1:83   |
| S-119/ $\beta$ -CD     | 27.4 ± 1.0      | 4424.9 ± 162.7 | 12.2     | 17.7   | 1:2                      | 1:2    |
| S-119/HP- $\beta$ -CD  | 14.0 ± 0.6      | 2261.0 ± 79.0  | 6.2      | 9.1    | 1:17                     | 1:28   |
| S-119/O-M- $\beta$ -CD | 18.7 ± 0.7      | 3693.4 ± 185.3 | 8.3      | 14.8   | 1:13                     | 1:7    |

$$^*K_s = \frac{\text{slope}}{S_2^0(1 - \text{slope})}; ^{**}CE = \frac{\text{slope}}{(1 - \text{slope})} \times 100\%; ^{***}\text{Drug : CD} = 1 : \left(1 + \frac{1}{CE}\right)$$
**Table S3.** Gibbs free energy of solubilization process ( $\Delta G_s^0$ ), micelle formation ( $\Delta G_{m/w}^0$ ) and complexation ( $\Delta G_C^0$ ) for S-119 in buffer pH 2.0 and pH 7.4 at different excipients concentration ( $C_{exc}$ ) at 25 °C.

| $C_{exc}$<br>(w/v%) | $\Delta G_s^0$<br>(kJ·mol <sup>-1</sup> ) | $\Delta G_s^0$<br>(kJ·mol <sup>-1</sup> ) | $\Delta G_{m/w}^0$<br>(kJ·mol <sup>-1</sup> ) | $\Delta G_{m/w}^0$<br>(kJ·mol <sup>-1</sup> ) | $\Delta G_C^0$<br>(kJ·mol <sup>-1</sup> ) | $\Delta G_C^0$<br>(kJ·mol <sup>-1</sup> ) |
|---------------------|-------------------------------------------|-------------------------------------------|-----------------------------------------------|-----------------------------------------------|-------------------------------------------|-------------------------------------------|
|                     | pH 2.0                                    | pH 7.4                                    | pH 2.0                                        | pH 7.4                                        | pH 2.0                                    | pH 7.4                                    |
| PEG 6000            |                                           |                                           |                                               |                                               |                                           |                                           |
| 1.5                 | -0.16                                     | -1.66                                     |                                               |                                               |                                           |                                           |
| 4.0                 | -0.41                                     | -7.54                                     |                                               |                                               |                                           |                                           |
| 5.5                 | -0.56                                     | -11.49                                    |                                               |                                               |                                           |                                           |
| 7.0                 | -0.68                                     | -12.72                                    |                                               |                                               |                                           |                                           |
| 10.0                | -0.93                                     | -13.04                                    |                                               |                                               |                                           |                                           |
| PEG 35000           |                                           |                                           |                                               |                                               |                                           |                                           |
| 1.5                 | -0.08                                     | -2.01                                     |                                               |                                               |                                           |                                           |
| 4.0                 | -0.19                                     | -5.87                                     |                                               |                                               |                                           |                                           |
| 5.5                 | -0.26                                     | -9.03                                     |                                               |                                               |                                           |                                           |
| 7.0                 | -0.31                                     | -12.24                                    |                                               |                                               |                                           |                                           |
| 10.0                | -0.44                                     | -12.85                                    |                                               |                                               |                                           |                                           |
| PVP                 |                                           |                                           |                                               |                                               |                                           |                                           |
| 1.5                 | -0.08                                     | -4.83                                     |                                               |                                               |                                           |                                           |
| 4.0                 | -0.30                                     | -4.93                                     |                                               |                                               |                                           |                                           |
| 5.5                 | -0.37                                     | -8.53                                     |                                               |                                               |                                           |                                           |
| 7.0                 | -0.50                                     | -12.99                                    |                                               |                                               |                                           |                                           |
| 10.0                | -0.68                                     | -13.50                                    |                                               |                                               |                                           |                                           |
| Brij S20            |                                           |                                           |                                               |                                               |                                           |                                           |
| 1.5                 | 0.33                                      | -8.21                                     |                                               |                                               |                                           |                                           |
| 4.0                 | 0.61                                      | -10.78                                    |                                               |                                               |                                           |                                           |
| 5.5                 | 0.63                                      | -11.59                                    |                                               |                                               |                                           |                                           |
| 7.0                 | 0.63                                      | -12.25                                    | -                                             | -19.19                                        | -                                         | -                                         |
| 10.0                | 0.63                                      | -13.12                                    |                                               |                                               |                                           |                                           |
| F127                |                                           |                                           |                                               |                                               |                                           |                                           |
| 1.5                 | 0                                         | -9.06                                     |                                               |                                               |                                           |                                           |
| 4.0                 | 0.01                                      | -11.65                                    |                                               |                                               |                                           |                                           |
| 5.5                 | 0.18                                      | -12.44                                    |                                               |                                               |                                           |                                           |
| 7.0                 | 0.27                                      | -13.06                                    | -                                             | -25.96                                        | -                                         | -                                         |
| 10.0                | -                                         | -13.97                                    |                                               |                                               |                                           |                                           |
| $\alpha$ -CD        |                                           |                                           |                                               |                                               |                                           |                                           |
| 1.5                 | -0.19                                     | -4.16                                     |                                               |                                               |                                           |                                           |
| 4.0                 | -0.45                                     | -6.45                                     |                                               |                                               |                                           |                                           |
| 5.5                 | -0.61                                     | -7.13                                     | -                                             | -                                             | -4.00                                     | -14.17                                    |
| 7.0                 | -0.75                                     | -7.73                                     |                                               |                                               |                                           |                                           |
| $\beta$ -CD         |                                           |                                           |                                               |                                               |                                           |                                           |
| 0.11                | -0.06                                     | -3.94                                     |                                               |                                               |                                           |                                           |
| 0.17                | -0.09                                     | -4.74                                     | -                                             | -                                             | -8.21                                     | -20.81                                    |

|          |       |        |   |   |       |        |
|----------|-------|--------|---|---|-------|--------|
| 0.23     | −0.12 | −5.37  |   |   |       |        |
| 0.34     | −0.18 | −6.23  |   |   |       |        |
| 0.45     | −0.07 | −4.03  |   |   |       |        |
| HP-β-CD  |       |        |   |   |       |        |
| 1.5      | −0.33 | −7.89  |   |   |       |        |
| 4.0      | −0.79 | −10.16 | - | - | −6.55 | −19.15 |
| 7.0      | −1.27 | −11.57 |   |   |       |        |
| 10.0     | −1.66 | −12.44 |   |   |       |        |
| O-M-β-CD |       |        |   |   |       |        |
| 1.5      | −0.39 | −8.77  |   |   |       |        |
| 4.0      | −0.96 | −11.11 |   |   |       |        |
| 5.5      | −1.24 | −11.90 | - | - | −7.26 | −20.36 |
| 7.0      | −1.49 | −12.52 |   |   |       |        |
